# Supplementary material for: Interpretation of Genomic Variants Using a Unified Biological Network Approach
Source: PubMed Central journal article supplement (PMC3591262; doi:10.1371/journal.pcbi.1002886), 2013-03-07

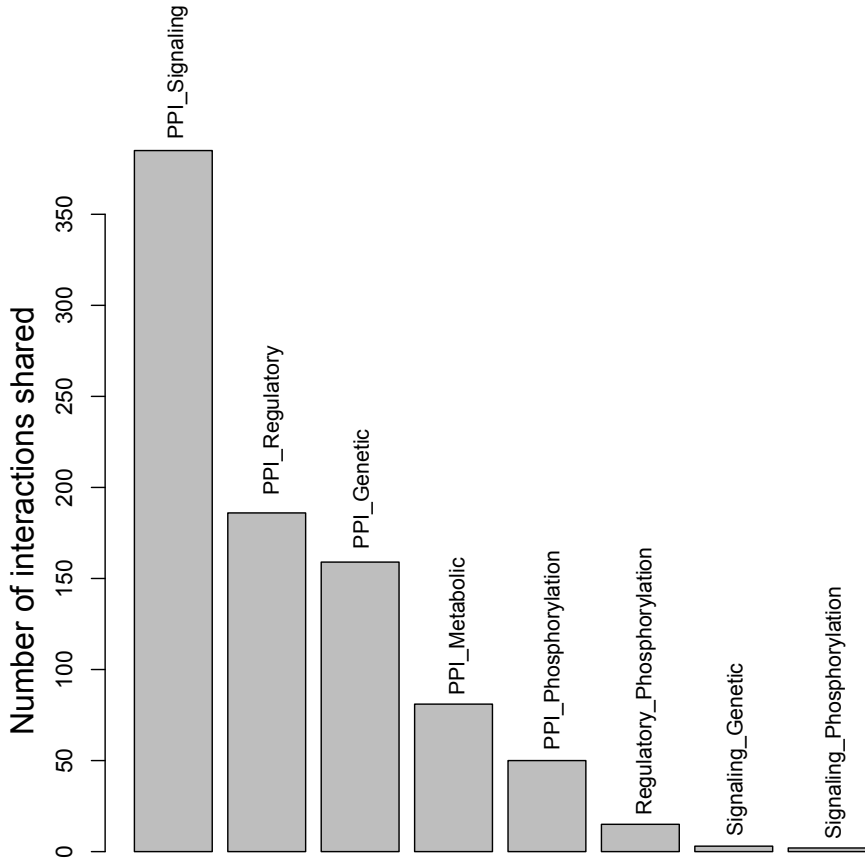

Supplement: pcbi.1002886.s001.pdf [file pcbi.1002886.s001.pdf]
