# Supplementary material for: Interpretation of Genomic Variants Using a Unified Biological Network Approach
Source: PubMed Central journal article supplement (PMC3591262; doi:10.1371/journal.pcbi.1002886), 2013-03-07
Supplement: pcbi.1002886.s003.pdf [file pcbi.1002886.s003.pdf]

| <b>Network</b>  | <b>Number of genes</b> | <b>Number of unique interactions</b> |
|-----------------|------------------------|--------------------------------------|
| PPI             | 9,612                  | 43,722                               |
| Phosphorylation | 2,392                  | 27,900                               |
| Signaling       | 530                    | 994                                  |
| Metabolic       | 1,035                  | 9,714                                |
| Genetic         | 272                    | 263                                  |
| Regulatory      | 9,314                  | 27,914                               |
| Multinet        | 14,443                 | 109,598                              |
