# Supplementary material for: Interpretation of Genomic Variants Using a Unified Biological Network Approach
Source: PubMed Central journal article supplement (PMC3591262; doi:10.1371/journal.pcbi.1002886), 2013-03-07
Supplement: pcbi.1002886.s006.pdf [file pcbi.1002886.s006.pdf]

| <b>Network</b>  | <b>SCC</b> | <b>pvalue</b> |
|-----------------|------------|---------------|
| PPI             | -0.155     | <2.2e-16      |
| Signaling       | -0.0252    | 5.789e-1      |
| Phosphorylation | -0.0909    | 5.46e-5       |
| Metabolic       | -0.0167    | 6.119e-1      |
| Genetic         | -0.0333    | 6.055e-1      |
| Regulatory      | -0.0552    | 1.752e-6      |
| Multinet        | -0.156     | <2.2e-16      |
