# Supplementary material for: Interpretation of Genomic Variants Using a Unified Biological Network Approach
Source: PubMed Central journal article supplement (PMC3591262; doi:10.1371/journal.pcbi.1002886), 2013-03-07
Supplement: pcbi.1002886.s007.pdf [file pcbi.1002886.s007.pdf]

| Network         | SCC (CEU) | Pvalue (CEU) | SCC (YRI) | Pvalue (YRI) | SCC (CHBJPT ) | Pvalue (CHBJPT) |
|-----------------|-----------|--------------|-----------|--------------|---------------|-----------------|
| PPI             | -0.07     | 7.922e-7     | -0.067    | 8.327e-7     | -0.025        | 9.534e-2        |
| Signaling       | -0.071    | 2.696e-1     | 0.067     | 2.806e-1     | 0.028         | 6.698e-1        |
| Phosphorylation | -0.063    | 4.565e-2     | -0.0078   | 7.96e-1      | 0.0089        | 7.86e-1         |
| Metabolic       | -0.034    | 4.011e-1     | -0.063    | 1.079e-1     | -0.055        | 2.006e-1        |
| Genetic         | 0.0047    | 9.596e-1     | -0.002    | 9.774e-1     | 0.029         | 7.688e-1        |
| Regulatory      | -0.013    | 3.634e-1     | -0.031    | 2.461e-2     | 0.0083        | 5.886e-1        |
| Multinet        | -0.081    | 6.189e-12    | -0.067    | 2.222e-9     | -0.03         | 1.368e-2        |
