# Supplementary material for: Interpretation of Genomic Variants Using a Unified Biological Network Approach
Source: PubMed Central journal article supplement (PMC3591262; doi:10.1371/journal.pcbi.1002886), 2013-03-07
Supplement: pcbi.1002886.s009.pdf [file pcbi.1002886.s009.pdf]

| Property               | Average LoF-tolerant | Average Essential | Wilcoxon pvalue |
|------------------------|----------------------|-------------------|-----------------|
| PPI degree             | 6.05                 | 15.96             | 8.63e-02        |
| Signaling degree       | NA                   | 2.94              | NA              |
| Phosphorylation degree | 42                   | 50.64             | 6.84e-01        |
| Metabolic degree       | 36.75                | 19.63             | 1.09e-02        |
| Genetic degree         | 1                    | 3.33              | 2.18e-1         |
| Regulatory degree      | 1.84                 | 10.02             | 2.80e-02        |
| Multinet degree        | 11.09                | 28.95             | 3.53e-04        |
| Number of networks     | 0.34                 | 1.85              | <2.2e-16        |
| Number of interfaces   | 1.5                  | 2.2               | 2.64e-01        |
| dN/dS                  | 0.86                 | 0.26              | 1.49e-14        |

| Property (Heterozygosity) | Average LoF-tolerant | Average Essential | Wilcoxon pvalue |
|---------------------------|----------------------|-------------------|-----------------|
| CEU missense              | 0.23                 | 0.18              | 2.09e-03        |
| YRI missense              | 0.19                 | 0.17              | 1.90e-02        |
| CHBJPT missense           | 0.26                 | 0.23              | 8.16e-02        |
| CEU synonymous            | 0.23                 | 0.20              | 2.52e-02        |
| YRI synonymous            | 0.20                 | 0.19              | 4.73e-01        |
| CHBJPT synonymous         | 0.25                 | 0.20              | 3.97e-03        |
